# Supplementary material for: Noble metal-free electrocatalysts for the oxygen reduction reaction based on iron and nitrogen-doped porous graphene
Source: Royal Society of Chemistry journal article supplement (doi:10.1039/c4ta04947k), 2014-11-19
Supplement: c4ta04947k1.pdf [file c4ta04947k1.pdf]

## Supporting Information

### Noble metal-free electrocatalysts for oxygen reduction reaction based on iron and nitrogen-doped porous graphene

Xiangjie Bo, Mian Li, Ce Han, Yufan Zhang, Anaclet Nsabimana, and Liping Guo\*

Faculty of Chemistry, Northeast Normal University, Changchun, 130024, P. R. China

Email: [guolp078@nenu.edu.cn](mailto:guolp078@nenu.edu.cn) (L.-P. Guo).

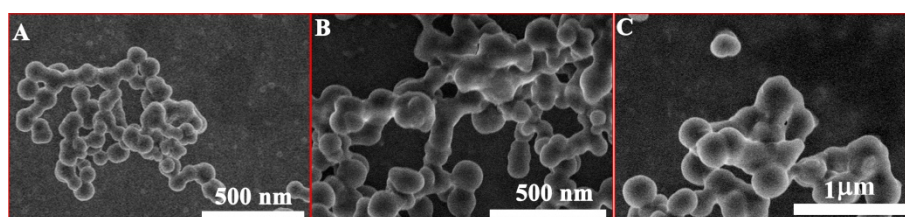

**Figure S1** SEM images of ZnO particles with different sizes.

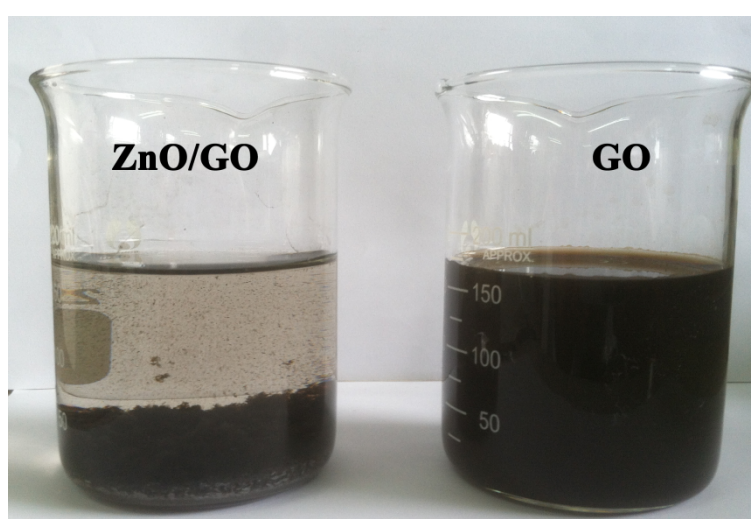

**Figure S2** Digital pictures of ZnO/GO and GO solutions stored for 48 h after sonication.

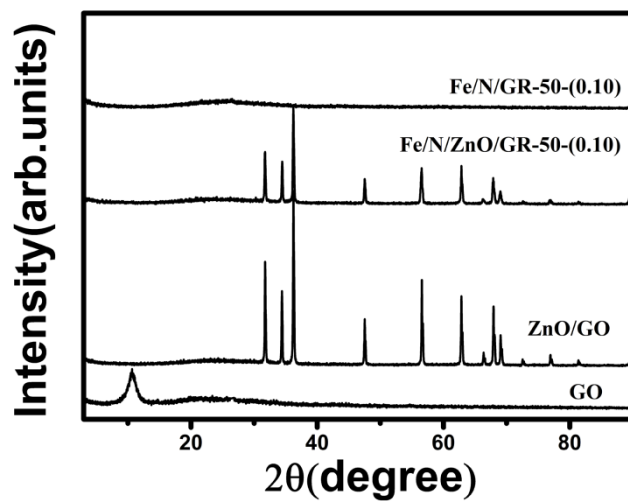

**Figure S3** XRD patterns of GO, ZnO/GO, Fe/N/ZnO/GR-50-(0.10), and Fe/N/GR-50-(0.10).

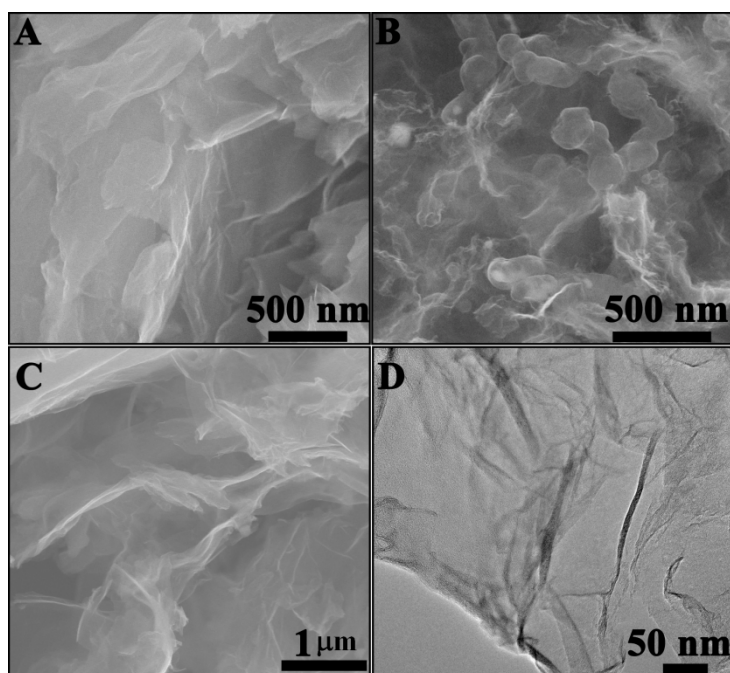

**Figure S4** SEM images of (A) GO, (B) Fe/N/ZnO/GR-90-(0.10), (C) Fe/N/GR-(0.10), and TEM image of (D) Fe/N/GR-(0.10).

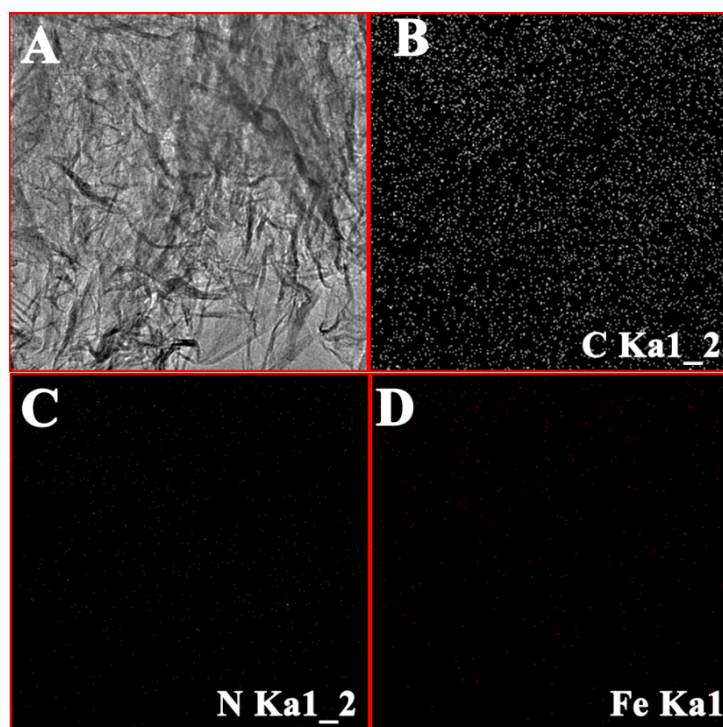

**Figure S5** (A) TEM images of Fe/N/GR-X-(0.10). The elemental maps for (B) C element, (C) N element, and (D) Fe element corresponding to (A).

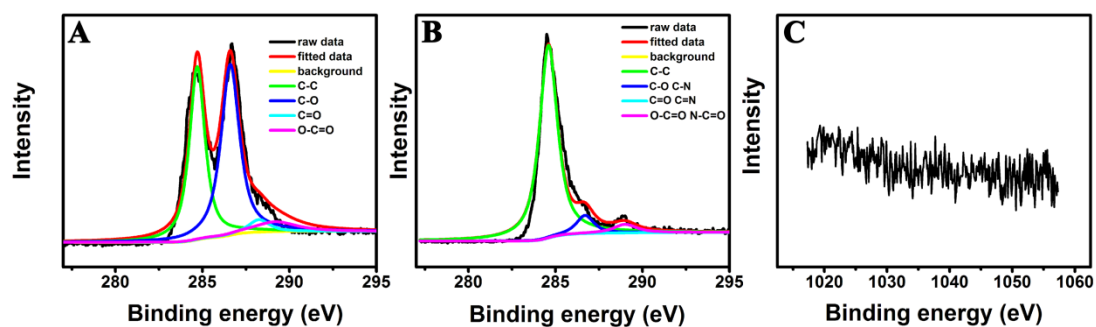

**Figure S6** C1s XPS spectra of (A) GO and (B) Fe/N/GR-50-(0.10). (C) Zn2p XPS spectrum of Fe/N/GR-50-(0.10).

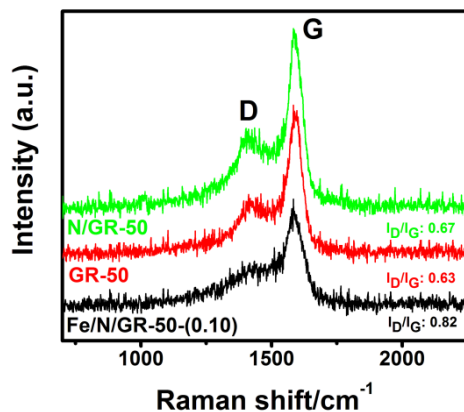

**Figure S7** C1s Raman spectra of GR-50, N/GR-50, and Fe/N/GR-50-(0.10).

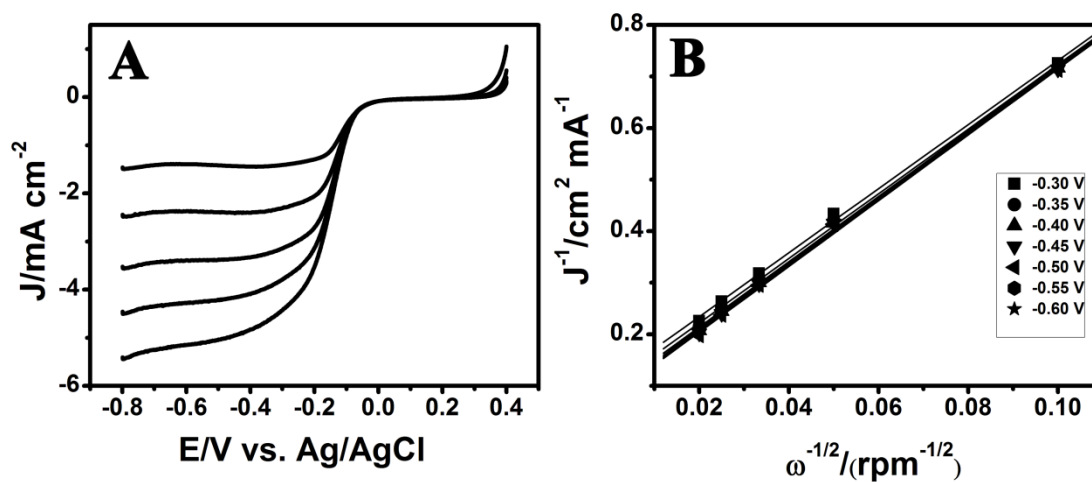

**Figure S8** (A) LSV curves at different rotation rates recorded for ORR at Pt/C in oxygen-saturated 0.1 M KOH. Scan rate: 5 mV s<sup>-1</sup>. Rotation rate: 100, 400, 900, 1600, and 2500 rpm. (B) Koutecky-Levich plots of Pt/C at different electrode potentials.

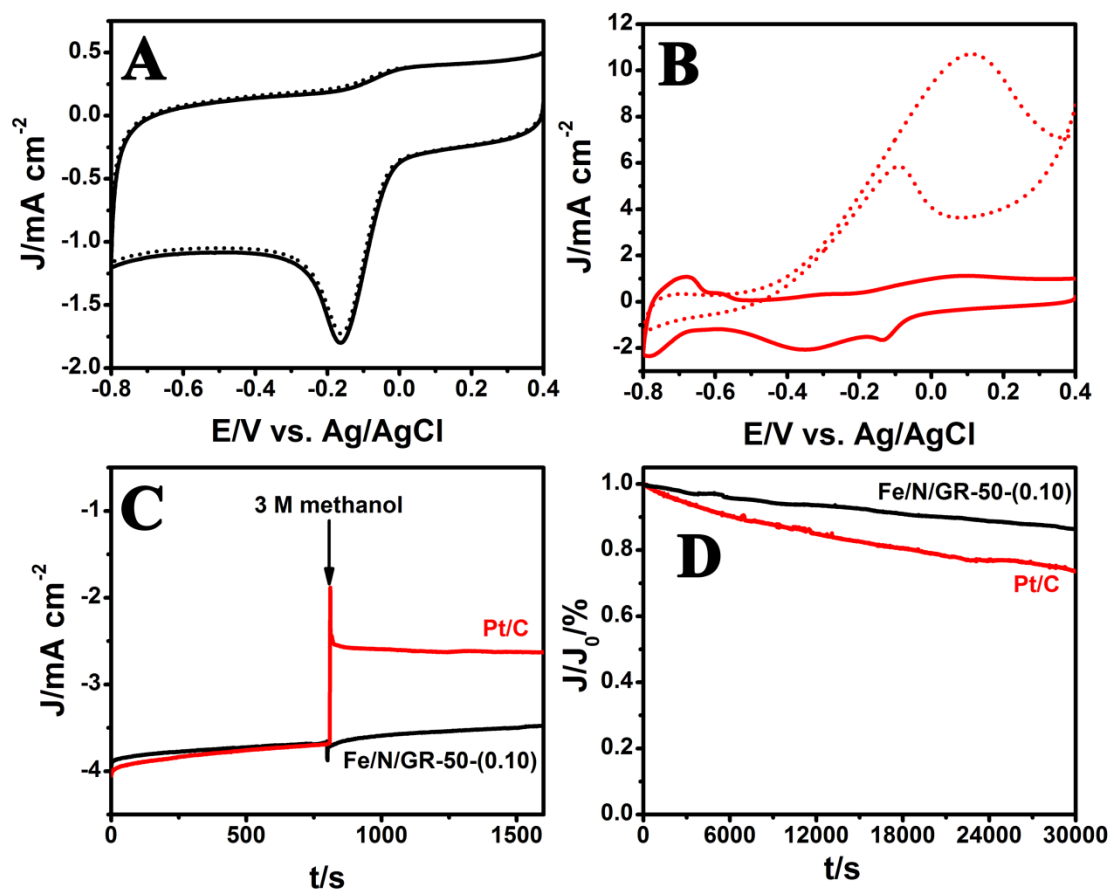

**Figure S9** CVs of (A) Fe/N/GR-50-(0.10) and (B) Pt/C in oxygen-saturated 0.1 M KOH (solid line) and oxygen-saturated 0.1 M KOH containing 3 M methanol (dot line). (C) The current-time response for Fe/N/GR-50-(0.10) and Pt/C at  $-0.35\text{ V}$  with the addition of 3 M methanol into oxygen-saturated 0.1 M KOH at 800 s. (D) The relative decrease of the current density with time for Fe/N/GR-50-(0.10) and Pt/C.

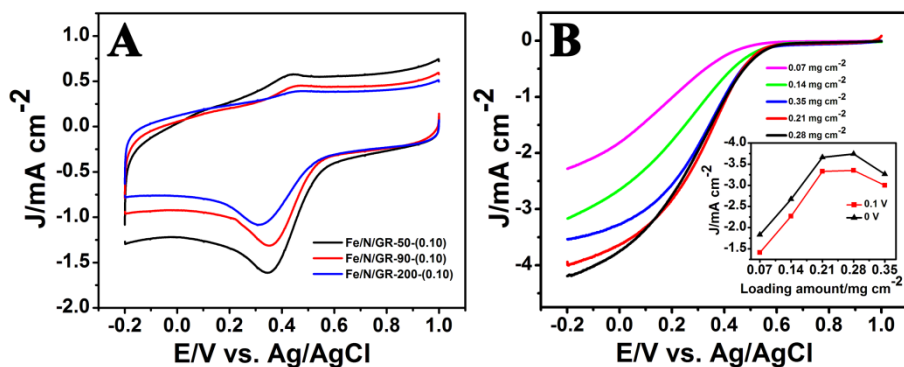

**Figure S10** (A) CVs of Fe/N/GR-50-(0.10) (black), Fe/N/GR-90-(0.10) (red), and Fe/N/GR-200-(0.10) (blue) in oxygen-saturated 0.5 M H<sub>2</sub>SO<sub>4</sub>. Scan rate of CVs: 50 mV s<sup>-1</sup>. (B) LSVs of Fe/N/GR-50-(0.10) with the loading amount of 0.07, 0.14, 0.21, 0.28, and 0.35 mg cm<sup>-2</sup>. Inset: The dependence of activity on loading amount for Fe/N/GR-50-(0.10) at 0 and 0.1 V.
